# Supplementary material for: Polyoxometalate-based supramolecular porous frameworks with dual-active centers towards highly efficient synthesis of functionalized p-benzoquinones
Source: Royal Society of Chemistry journal article supplement (doi:10.1039/d1gc03061b), 2021-01-01
Supplement: d1gc03061b1.pdf [file d1gc03061b1.pdf]

## Electronic Supporting Information

# Polyoxometalate-based supramolecular porous frameworks with dual-active centers toward highly-efficient synthesis of functionalized *p*-benzoquinones

Shenzhen Chang, Yanhong Chen, Haiyan An,\* Qingshan Zhu, Huiyun Luo, Yaohui Huang

State Key Laboratory of Fine Chemicals, School of Chemical Engineering, Dalian University of Technology, Dalian 116023, People's Republic of China.

## CONTENTS

### *Section I. Supplementary Experimental Section*

- 1.1 Materials and instrumentation.
- 1.2 Synthesis of  $K_5[BW_{12}O_{40}] \cdot xH_2O$ .
- 1.3 Synthesis of  $K_4[SiW_{12}O_{40}] \cdot xH_2O$ .
- 1.4 Synthesis of  $K_3(H_2O)_4[Cu(tza)_2(H_2O)]_2[Cu(Htza)_2(H_2O)_2][BW_{12}O_{40}] \cdot 6H_2O$  (**1**).
- 1.5 Synthesis of  $H_3K_3(H_2O)_3[Cu(Htza)_2(H_2O)]_3[SiW_{12}O_{44}] \cdot 14H_2O$  (**2**).
- 1.6 X-Ray crystallography.
- 1.7 General methods for catalyzing oxidation.
- 1.8 General methods for detecting TBHP.
- 1.9 Calculations of oxidant utilization efficiency.

### *Section II. Supplementary Structure Figures*

- Fig. S1. ORTEP drawing of **1** with thermal ellipsoids at 50% probability.
- Fig. S2. The coordination modes of Cu1 (left), and Cu2 (right) in **1**.
- Fig. S3. The interaction mode between  $BW_{12}$  anion and metal-organic units in **1**.
- Fig. S4. The available channels in **1**.
- Fig. S5. The POM-based 3D supramolecular structure of **1** viewed from the *b* axis.
- Fig. S6. ORTEP drawing of **2** with thermal ellipsoids at 50% probability.
- Fig. S7. The coordination modes of Cu1 in **2**.
- Fig. S8. Pseudo-dimeric cupric dicarboxylate units based on disorder Cu1 in **2**.
- Fig. S9. The 2D metal organic layer in **2**.
- Fig. S10. The available channels in **2**.

Fig. S11. The POM-based 3D supramolecular structure of **2** viewed from the *b* axis.

### ***Section III. Supplementary Physical Characterizations***

Fig. S12. IR spectra for **1**, **2**,  $K_5BW_{12}O_{40}$ ,  $K_4SiW_{12}O_{40}$ , and tetrazol-1-ylacetic acid.

Fig. S13. The simulated and experimental PXRD patterns for **1** and **2**.

Fig. S14. UV-vis diffuse reflectance spectra of **1** and **2**.

Fig. S15. The TGA curves of **1** and **2**.

Fig. S16. The molecular sizes of different organic substrates.

Fig. S17. The detection of oxidant.

Fig. S18. The test of the heterogeneous nature and the stability of the catalyst **1** and **2**.

Fig. S19. The UV-vis spectra of TMP oxidation catalyzed by **1** and **2**.

Fig. S20. The photographs of compound **1** and **2** before and after catalysis.

Fig. S21. Kinetic profiles of oxidation of TMP catalyzed by **1** with TBHP in  $CH_3CN$ .

Fig. S22. Kinetic profiles of oxidation of TMP catalyzed by **2** with TBHP in  $CH_3CN$ .

Fig. S23. The photoluminescence detection technology for probing hydroxyl radicals.

### ***Section IV. Supplementary Tables***

Table S1. The oxidation of TMP to TMBQ catalyzed by **1**.

Table S2. The oxidation of TMP to TMBQ catalyzed by **1** under different solvent.

Table S3. Comparison of representative systems for TMP oxidation.

Table S4. Comparison of TMP oxidation catalyzed by compounds **1-2** and  $PMoCu_6$  with TBHP as oxidant.

Table S5. Investigated the change of the content of W atom and Cu atom in the catalyst system after the oxidation reaction of TMP with ICP-AES.

Table S6. Crystal data and structure refinement for **1** and **2**.

### ***Section V. References***

## *Section I. Supplementary Experimental Section*

### **1.1 Materials and instrumentation.**

$\text{K}_5[\text{BW}_{12}\text{O}_{40}] \cdot x\text{H}_2\text{O}$  and  $\text{K}_5[\text{SiW}_{12}\text{O}_{40}] \cdot x\text{H}_2\text{O}$  were synthesized based on the literature method with slight modifications, which can also be proved by IR spectra.<sup>S1</sup> Other chemicals were used as purchased without purification. Elemental analyses (H, C and N) were performed on a Perkin-Elmer 2400 CHN elemental analyzer. IR spectra were recorded in the range 4000-400  $\text{cm}^{-1}$  on a Nexus Euro FT/IR Spectrophotometer using KBr pellets. The powder X-ray diffraction (PXRD) patterns of the as-prepared products were carried out by using Rigaku SmartLab X-ray diffractometer with Cu-K $\alpha$  radiation ( $\lambda = 0.154 \text{ nm}$ ) and  $2\theta$  transforming from 5 to 50°. The X-ray single crystal diffraction were collected by Bruker D8 Venture single crystal diffractometer with MoK $\alpha$  radiation. Diffuse reflectivity spectra were collected on a finely ground sample with a Cary 500 spectrophotometer equipped with a 110 mm diameter integrating sphere, which were measured from 200 to 800 nm. Liquid UV-vis spectrum was measured from 250 to 450 nm on Techcomp UV1000 spectrophotometer. ICP-AES was performed on Optima 7000 DV of Perkinelmer. Thermogravimetric (TG) analysis is performed on a TGA/DSC 3+ (Mettler Toledo) equipped with a DTA sensor in a nitrogen atmosphere at a rate of 10°C  $\text{min}^{-1}$ . The products in catalytic experiments were determined by gas chromatography with SE-54 capillary column (Techcomp GC 7900II) and gas chromatography-mass spectroscopy (Trace ISQ). The EDS were determined using a JSM-7610F Plus scanning electron microscope at an accelerating voltage of 10 kV. The fluorescence spectra were recorded on Hitachi F7000 spectrophotometer at 380 nm excitation wavelength.

### **1.2 Synthesis of $\text{K}_5[\text{BW}_{12}\text{O}_{40}] \cdot x\text{H}_2\text{O}$ .**

$\text{Na}_2\text{WO}_4 \cdot 2\text{H}_2\text{O}$  (50 g, 0.15 mol) and  $\text{H}_3\text{BO}_3$  (2.5 g, 0.04 mol) were dissolved in 50 mL of distilled water. Then 16 mL of concentrated hydrochloric acid was slowly added. The solution was allowed to boil for 3 h and removed the colorless solid from the bottom by suction filtration. The filtrate was heated and boiled for 0.5 h after adjusting the pH~2 with 6M HCl. Finally, 12 g of potassium chloride was added to obtain white precipitates, which were suction filtered and dried at room temperature. Yield: 65% (based on  $\text{Na}_2\text{WO}_4 \cdot 2\text{H}_2\text{O}$ ). IR (Fig. S12, KBr pellet,  $\text{cm}^{-1}$ ): 1002 (w), 958 (s), 910 (s), 803 (s), 506 (m).

### 1.3 Synthesis of $\text{K}_4[\text{SiW}_{12}\text{O}_{40}] \cdot x\text{H}_2\text{O}$ .

The synthesis of  $\text{K}_4[\text{SiW}_{12}\text{O}_{40}] \cdot x\text{H}_2\text{O}$  is a two-step process. The first part is to synthesize  $\text{H}_4\text{SiW}_{12}\text{O}_{40} \cdot x\text{H}_2\text{O}$  as follows:  $\text{Na}_2\text{WO}_4 \cdot 2\text{H}_2\text{O}$  (100 g, 0.30 mol) was dissolved in 200 mL of distilled water, and 20 mL of concentrated hydrochloric acid was slowly added dropwise. The solution was heated to boiling, and added 20 mL of concentrated hydrochloric acid again. Then 50 mL of sodium silicate hot solution ( $\text{Na}_2\text{SiO}_3 \cdot 9\text{H}_2\text{O}$ , 7.5g, 0.026 mol) and 60 mL of concentrated hydrochloric acid were added. The solution was kept boiling for 0.5 h and then cooled to room temperature. The precipitate produced could be filtered out. The filtrate was transferred to a separatory funnel, and 40 mL of concentrated hydrochloric acid and 50 mL of ether were added. The solution was shaken evenly, and the bottom oily layer was drawn off. This complex was added a few drops of distilled water and dried in vacuum overnight to obtain a white solid ( $\text{H}_4\text{SiW}_{12}\text{O}_{40} \cdot x\text{H}_2\text{O}$ ).

In the second stage, 25 g of  $\text{H}_4\text{SiW}_{12}\text{O}_{40} \cdot x\text{H}_2\text{O}$  was added to 30 mL of distilled water, and heated to dissolve completely. Then 20 mL of 2 M KOH solution was added, heated to evaporate and crystallized, and finally a white solid was collected. Yield: 59% (based on  $\text{Na}_2\text{WO}_4 \cdot 2\text{H}_2\text{O}$ ). IR (Fig. S12, KBr pellet,  $\text{cm}^{-1}$ ): 1019 (w), 980 (s), 920 (s), 882 (w), 789 (s), 536 (m).

### 1.4 Synthesis of $\text{K}_3(\text{H}_2\text{O})_4[\text{Cu}(\text{tza})_2(\text{H}_2\text{O})]_2[\text{Cu}(\text{Htza})_2(\text{H}_2\text{O})_2][\text{BW}_{12}\text{O}_{40}] \cdot 6\text{H}_2\text{O}$ (1).

$\text{K}_5[\text{BW}_{12}\text{O}_{40}] \cdot x\text{H}_2\text{O}$  (0.25 g,  $\sim 0.080$  mmol), Htza (0.07 g, 0.547 mmol) and  $\text{CuCl}_2 \cdot 2\text{H}_2\text{O}$  (0.090 g, 0.528 mmol) were dissolved in 25 mL of distilled water and stirred for 30 min. The pH of the resulting mixture was adjusted to 4.7 with 4 M KOH solution. After stirring for another 30 min, the mixture was heated and stirred for 3.5 h at 80 °C. Cooled to room temperature and filter, the filtrate was kept undisturbed for two weeks under ambient conditions. Blue striped crystals were obtained in about 32% yield (based on  $\text{K}_5[\text{BW}_{12}\text{O}_{40}] \cdot x\text{H}_2\text{O}$ ).  $\text{C}_{18}\text{H}_{48}\text{N}_{24}\text{K}_3\text{Cu}_3\text{BW}_{12}\text{O}_{66}$  (4181.52), found (calcd)%: C, 5.43 (5.17); H, 1.52 (1.16); N, 8.00 (8.04). IR (Fig. S12, KBr pellet,  $\text{cm}^{-1}$ ): 3452 (s), 3134 (s), 3002 (s), 1621 (s), 1504 (m), 1453 (w), 1388 (s), 1298 (s), 1189 (m), 1103 (s), 999 (w), 955 (s), 905 (s), 826 (s).

### 1.5 Synthesis of $\text{H}_3\text{K}_3(\text{H}_2\text{O})_3[\text{Cu}(\text{Htza})_2(\text{H}_2\text{O})]_3[\text{SiW}_{12}\text{O}_{44}] \cdot 14\text{H}_2\text{O}$ (2).

The synthesis process of **2** was similar to that of **1**, except that  $\text{K}_5[\text{SiW}_{12}\text{O}_{40}] \cdot x\text{H}_2\text{O}$  (0.25 g,  $\sim 0.075$  mmol) instead of  $\text{K}_5[\text{BW}_{12}\text{O}_{40}] \cdot x\text{H}_2\text{O}$ , and increase the mole ratio of copper salt in the system ( $\text{CuCl}_2 \cdot 2\text{H}_2\text{O}$ , 0.180 g, 1.056 mmol). The pH value was

adjusted to 3.07 by adding 4 M KOH dropwise and the mixture was heated for 3.0 h at 80 °C. The resulting solution was cooled to room temperature and filtered, and left to evaporate at room temperature. Gem blue hexagonal crystals of **2** were obtained after several days. Yield: 36% (based on  $K_5[SiW_{12}O_{40}] \cdot xH_2O$ ).  $C_{18}H_{67}N_{24}K_3Cu_3SiW_{12}O_{76}$  (4377.94), found (calcd)%: C, 5.24 (4.94); H, 1.62 (1.54); N, 7.66 (7.68). IR (Fig. S12, KBr pellet,  $cm^{-1}$ ): 3484 (s), 3141 (s), 2962 (s), 1641 (s), 1508 (m), 1429 (w), 1388 (s), 1305 (m), 1182 (m), 1148 (w), 1099 (s), 1015 (w), 973 (m), 924 (s), 884 (w), 800 (s), 699 (w).

### 1.6 X-Ray crystallography.

The crystal data of **1** and **2** were collected at 190(2) K with graphite monochromatic Mo  $K\alpha$  radiation ( $\lambda = 0.71073 \text{ \AA}$ ). The crystal structures were solved and refined by full matrix least-squares methods against  $F^2$  by using SHELXTL-2018 programs.<sup>S ( )</sup> All non-hydrogen atoms were refined with anisotropic temperature parameters. All hydrogen atoms associated with C and N atoms were placed in geometrically idealized positions using a riding model. Crystallographic data, structure refinements and CCDC reference numbers for **1** and **2** are listed in Table S6.

### 1.7 General methods for catalyzing oxidation.

The oxidation experiments were carried out in a glass reactor (1.5 mL), equipped with magnetic stirrer (600 rpm) and temperature control. The catalytic activities of **1** and **2** were first evaluated in the oxidations of 2,3,6-TMP (0.1 or 0.25 mmol). The effect of catalyst (0.25–0.625  $\mu\text{mol}$ ), oxidants ( $\geq 65\%$  tert-butyl hydroperoxide: 0.50–0.70 mmol), temperature (r.t.–80 °C) as well as solvents (0.5 mL) were analyzed. The reactions were started with the addition of TBHP to a mixture of 0.5 mL solvent containing substrates and catalysts **1** and **2**. The reaction products were identified by GC/MS and  $^1\text{H}$  NMR and quantified by GC using naphthalene as internal standard. Before recycle, the catalyst was separated by filtration, washed with MeCN, and dried in vacuum at 60 °C. In multi-cycle continuous experiment, the initial mol of phenol and TBHP were maintained at 0.25 mmol and 0.55 mmol by continuous addition after the reaction in the previous cycle. Blank experiments in the absence of catalyst, TBHP or both were also carried out at similar conditions.

### 1.8 General methods for detecting TBHP.

The standard curve of TBHP was established at 40 °C for 5 min. Typically, 3,3',5,5'-tetramethylbenzidine (TMB, 3.12  $\mu\text{mol}$ ) and TBHP (0.25–2.03  $\mu\text{mol}$ ) were added into

3 mL of acetate buffer solution (pH~3.95) in turn, and the resulting mixture was stirred at 40 °C for 5 min, and then filtered using a syringe filter immediately. The absorbance of the filtrates at 661 nm was measured on UV-vis spectrophotometer to evaluate the 3,3',5,5'-tetramethyl-[1,1'-bi(cyclohexylidene)]-2,2',5,5'-tetraene-4,4'-diiminium (oxTMB) content.

For TBHP detection after catalytic reaction. The reaction system was quickly filtered with a syringe filter to remove the catalysts, and 30 µL of the filtrate was added to 3mL of acetic acid buffer (pH~3.95) containing 3.12 µmol of TMB. The resulting mixture was stirred at 40 °C for 5 min, and then filtered again using a syringe filter immediately. The absorbance of the filtrates at 661 nm was measured on UV-vis spectrophotometer to evaluate the oxTMB content.

### 1.9 Calculations of oxidant utilization efficiency

TBHP efficiency (%) =  $100 \times [\text{mol of TBHP consumed in the formation of TMBQ/mol of TBHP converted}]$

(i) Mol of TBHP consumed in the formation of TMBQ =  $2 \times \text{mol of TMBQ}^a$ .

(ii) Mol of TBHP converted = total mol of TBHP has been originally used – the remaining mol of TBHP in the system after the reaction<sup>b</sup>.

<sup>a</sup>According to the reaction stoichiometry, TMP oxidation to TMBQ requires 2 equivalents of TBHP.

<sup>b</sup>The remaining mol of TBHP in the system after the reaction was estimated by the UV-Vis spectrophotometry and detailed experimental operations see “1.8 General methods for detecting TBHP”.

*Section II. Supplementary Structure Figures*

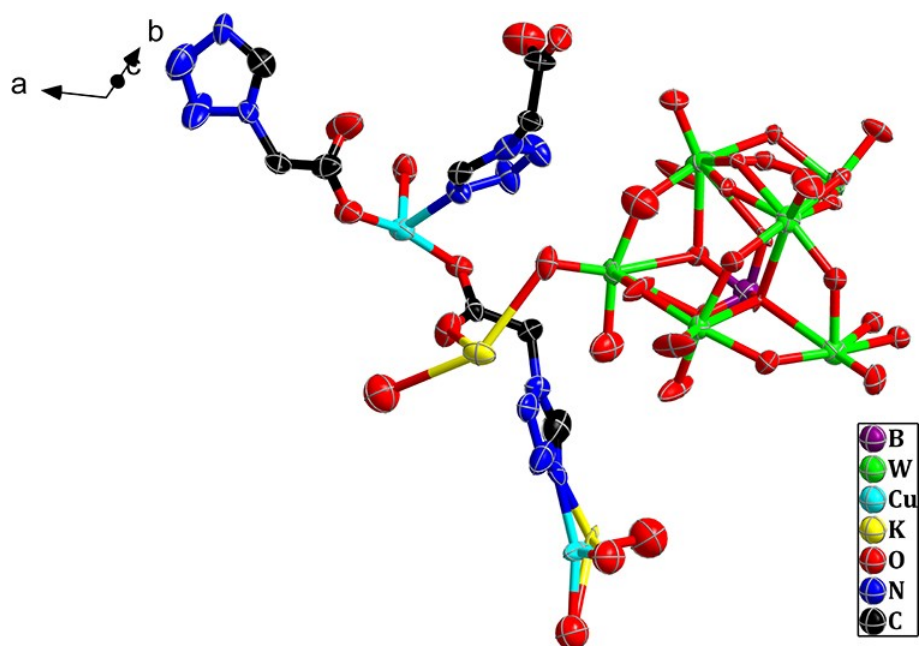

**Fig. S1.** ORTEP drawing of **1** with thermal ellipsoids at 50% probability.

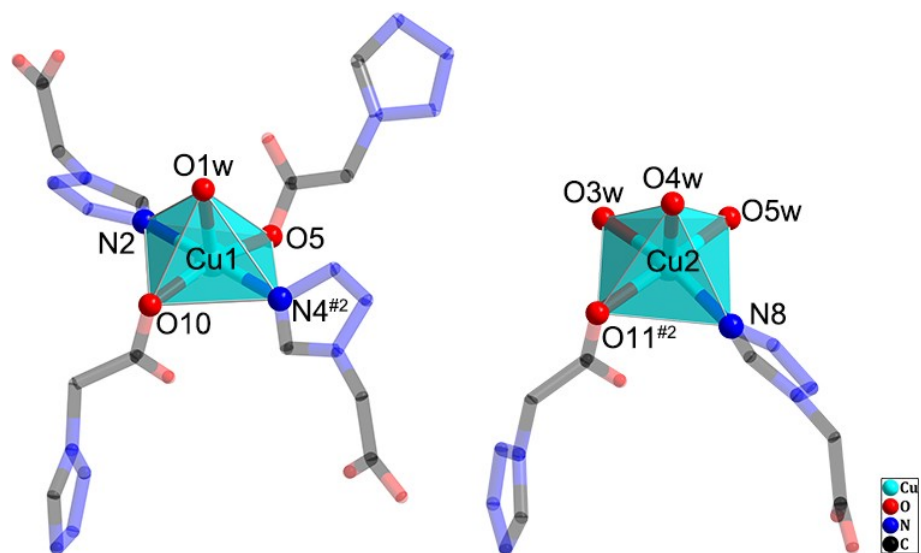

**Fig. S2.** The coordination modes of Cu1 (left), and Cu2 (right) in **1**. The “w” refers to coordination water molecules and the symmetry transformations used to generate equivalent atoms: #2:  $x-y, x-1, -z+2$ .

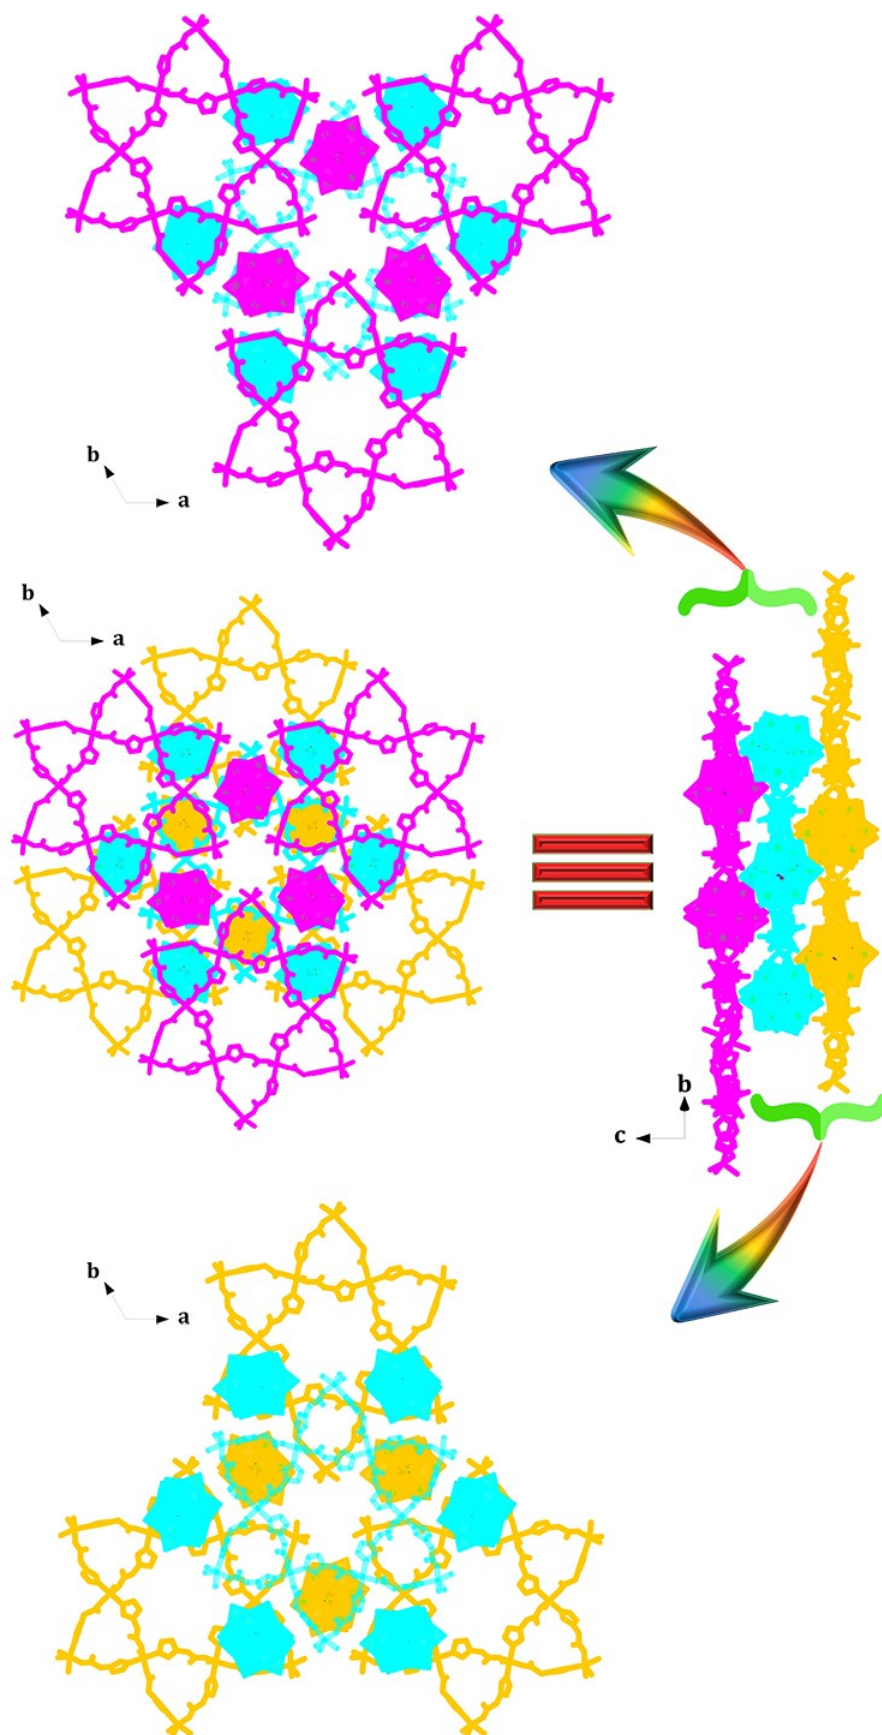

**Fig. S3.** The interaction mode between  $BW_{12}$  anion and metal-organic units in **1**.



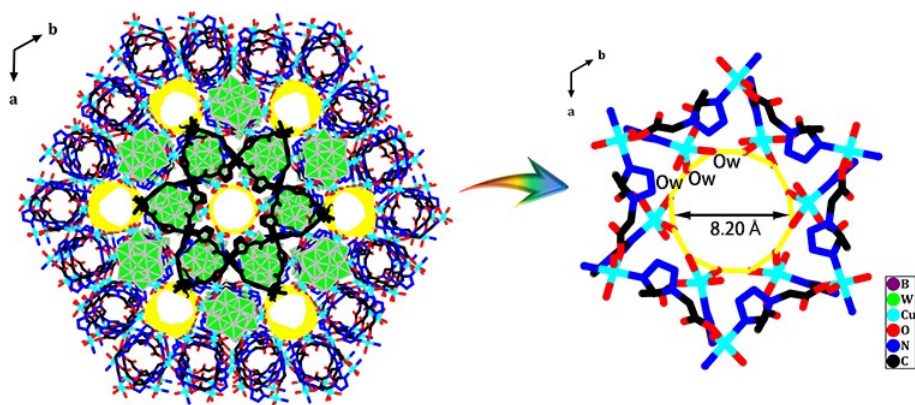

Fig. S4. The available channels in **1**. The “Ow” refers to coordination water molecules.

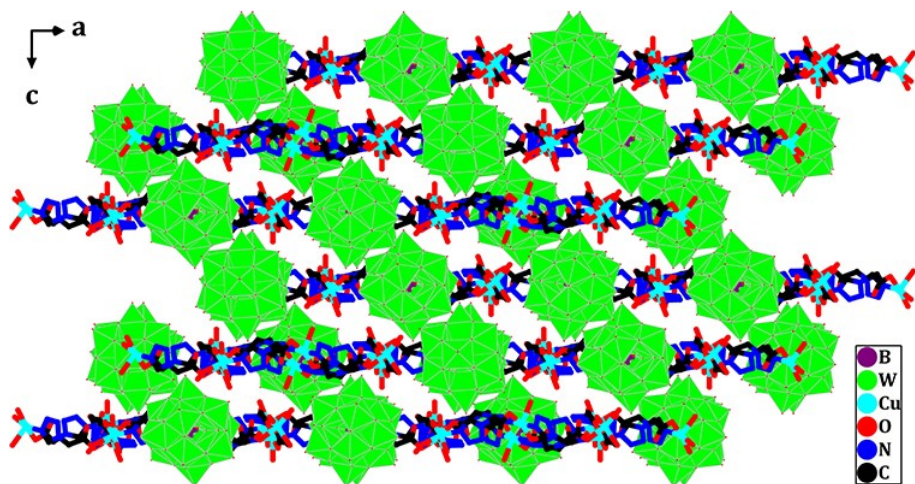

Fig. S5. The POM-based 3D supramolecular structure of **1** viewed from the *b* axis.

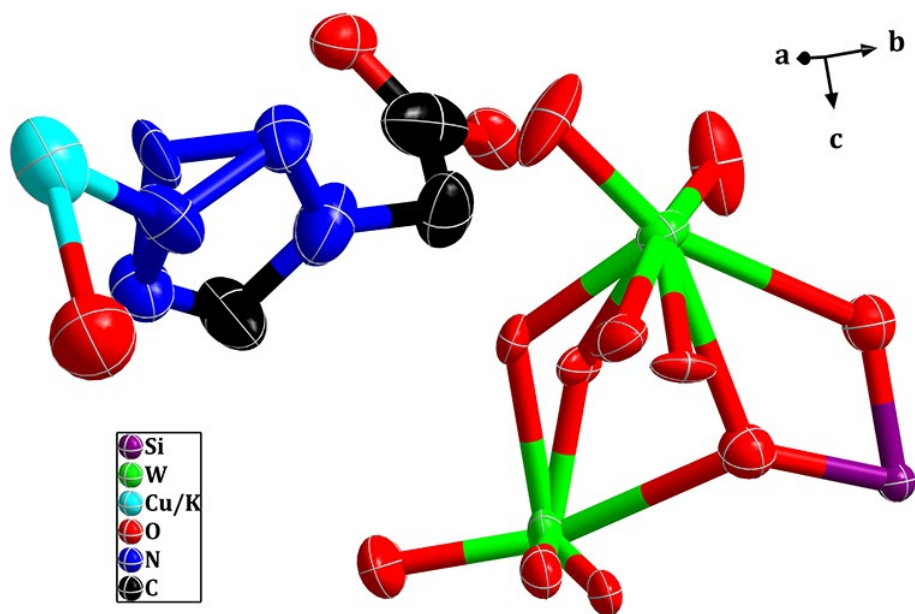

Fig. S6. ORTEP drawing of **2** with thermal ellipsoids at 50% probability.

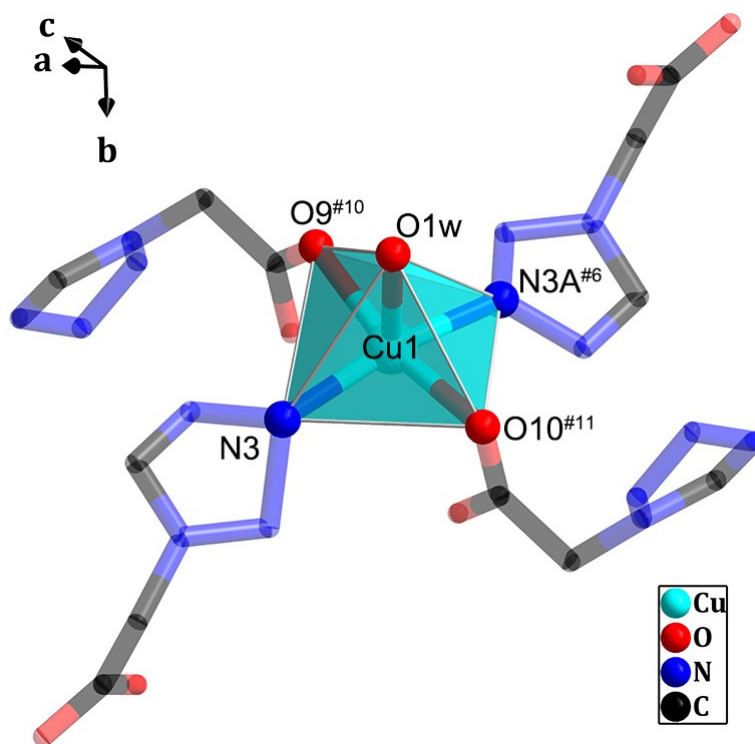

**Fig. S7.** The coordination modes of Cu1 in **2**. The “w” refers to coordination water molecules and the symmetry transformations used to generate equivalent atoms: #6 -x+1, -y+1, -z+2; #10 -y+1, x-y+1, z; #11 y, -x+y, -z+2.

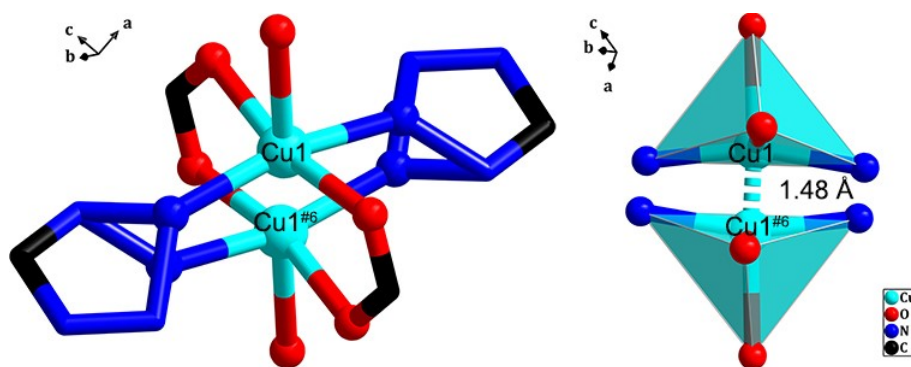

**Fig. S8.** Pseudo-dimeric cupric dicarboxylate units based on disorder Cu1 in **2**. The symmetry transformations used to generate equivalent atoms: #6 -x+1, -y+1, -z+2.

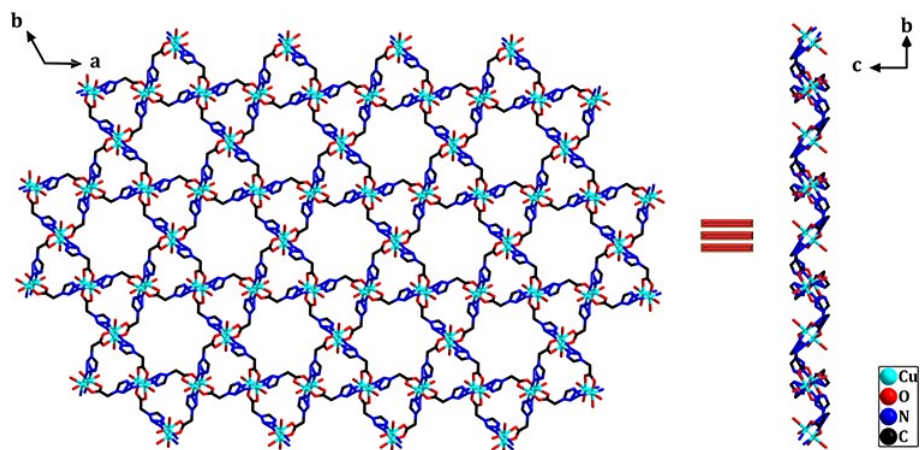

Fig. S9. The 2D metal organic layer in **2**.

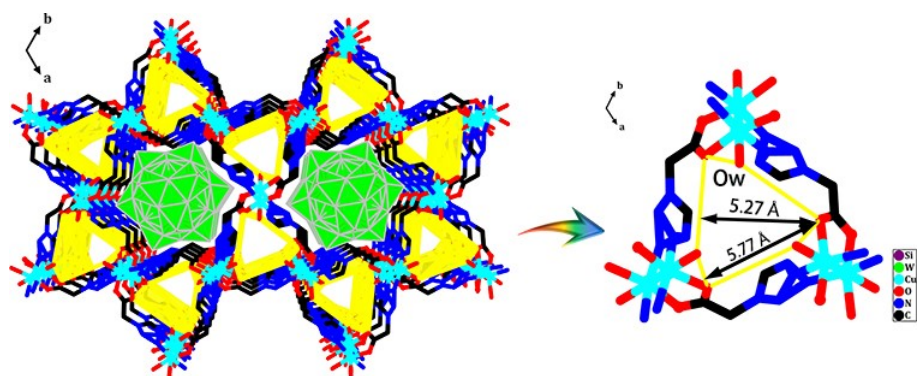

Fig. S10. The available channels in **2**. The “Ow” refers to coordination water molecules.

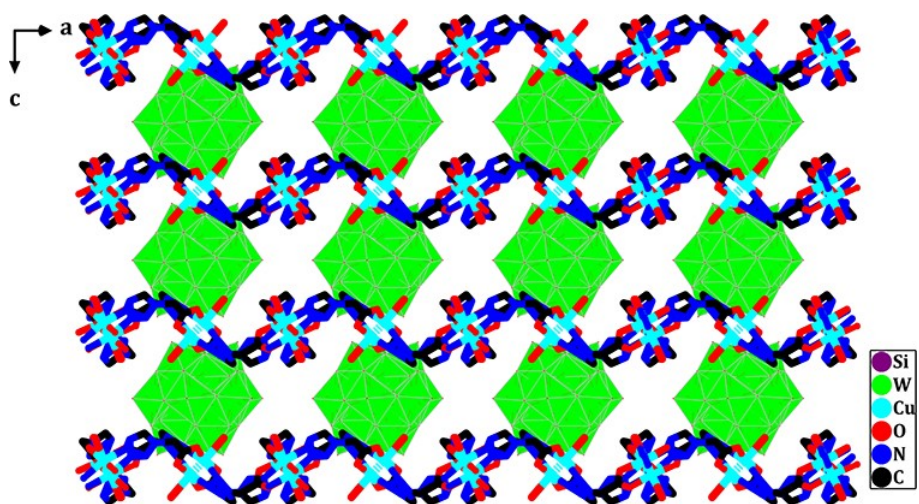

Fig. S11. The POM-based 3D supramolecular structure of **2** viewed from the *b* axis.

*Section III. Supplementary Physical Characterizations*

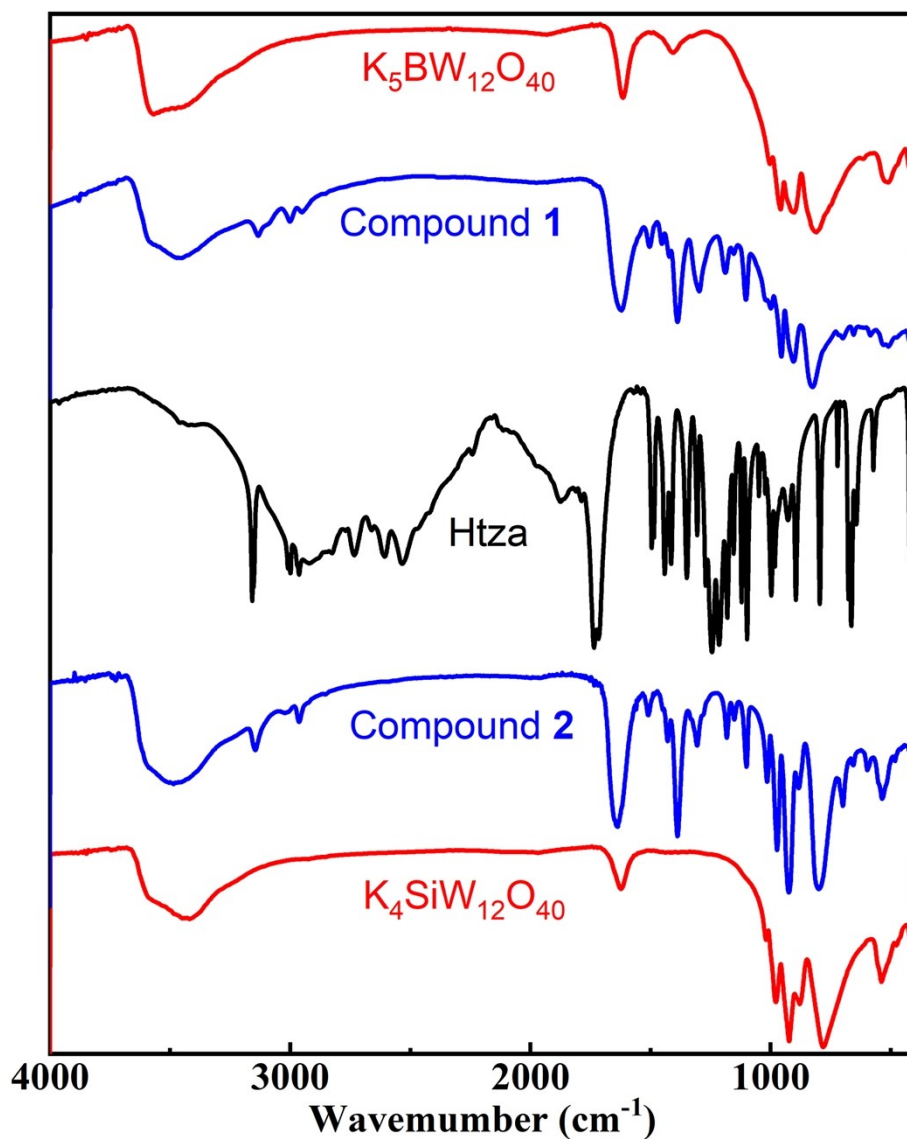

**Fig. S12.** IR spectra for **1**, **2**,  $K_5BW_{12}O_{40}$ ,  $K_4SiW_{12}O_{40}$ , and tetrazol-1-ylacetic acid.

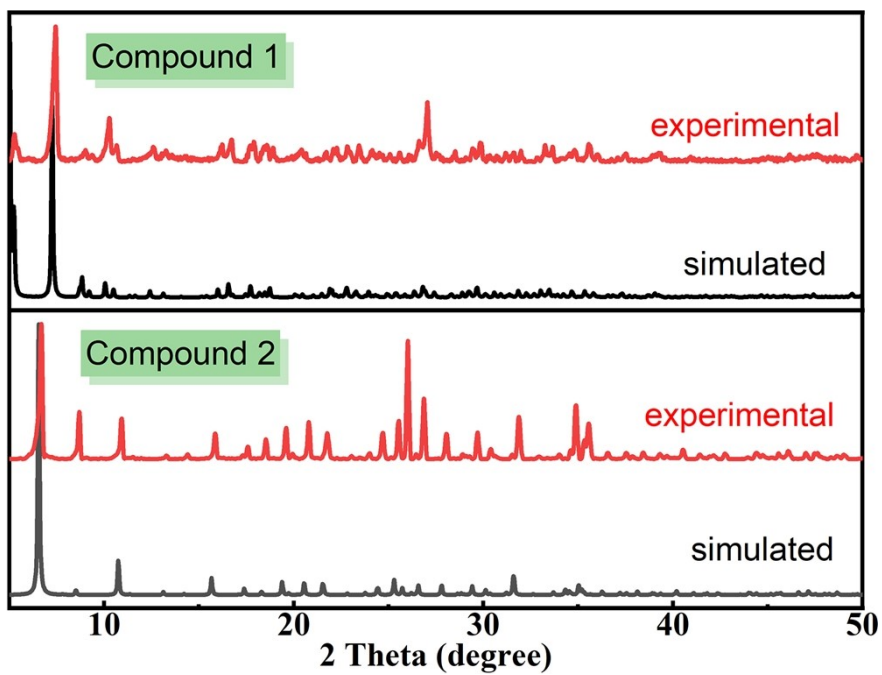

Fig. S13. The simulated and experimental PXRD patterns for 1 and 2.

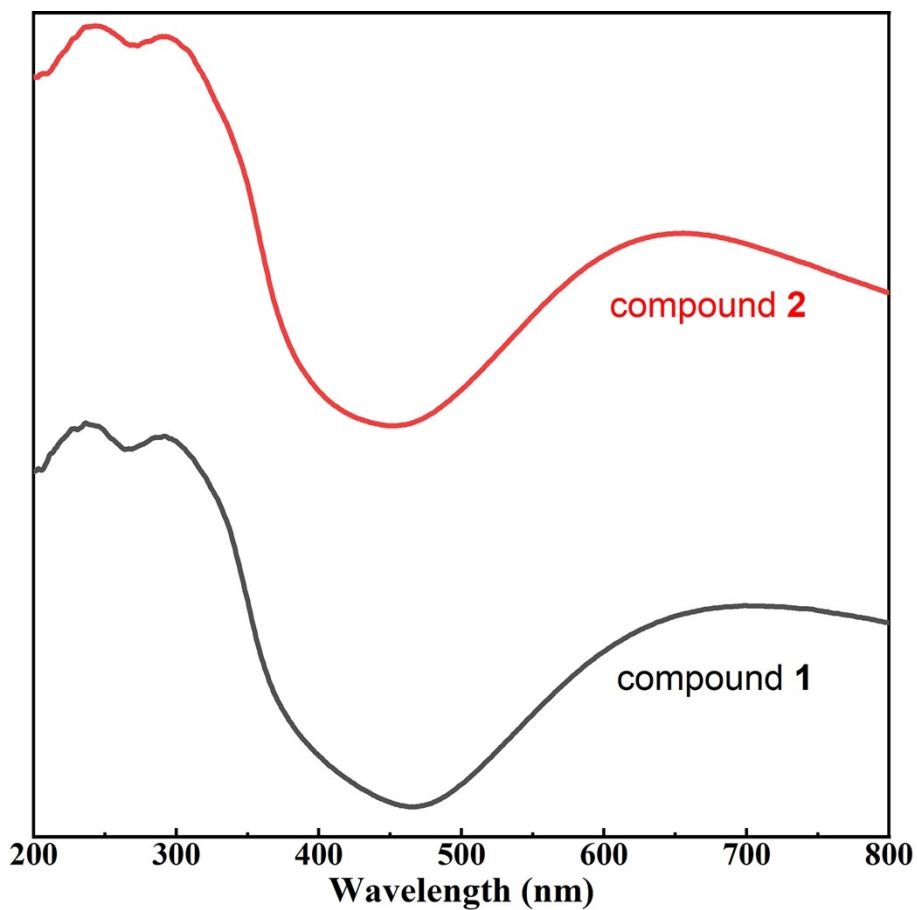

Fig. S14. UV-vis diffuse reflectance spectra of 1 and 2.

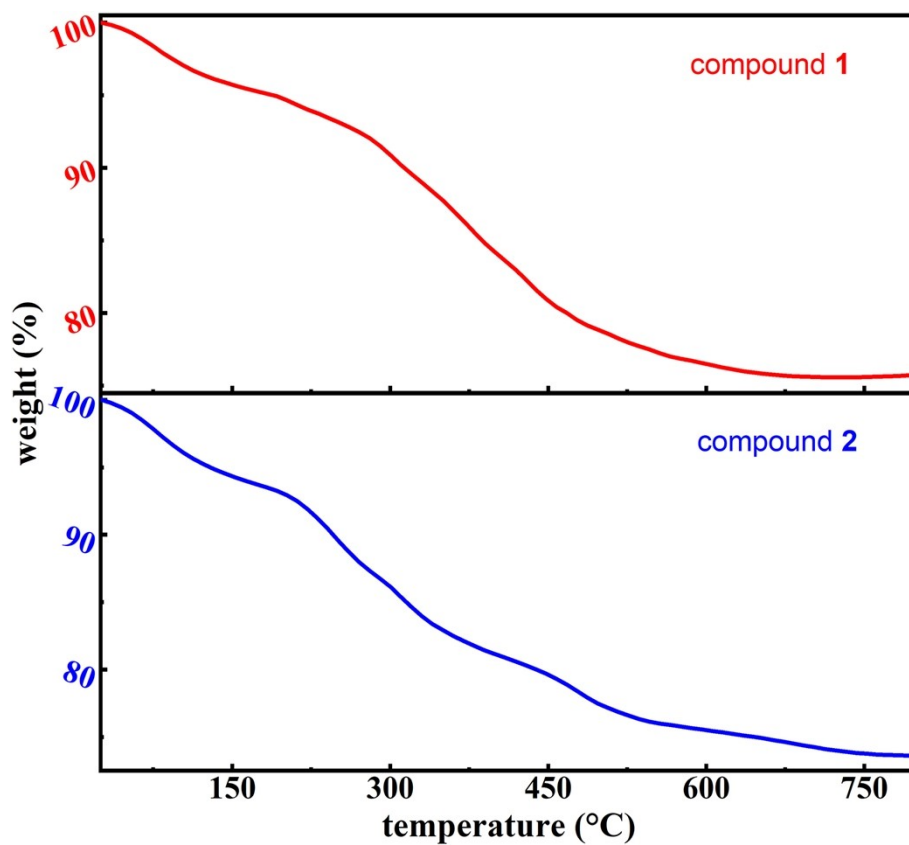

Fig. S15. The TGA curves of 1 and 2.

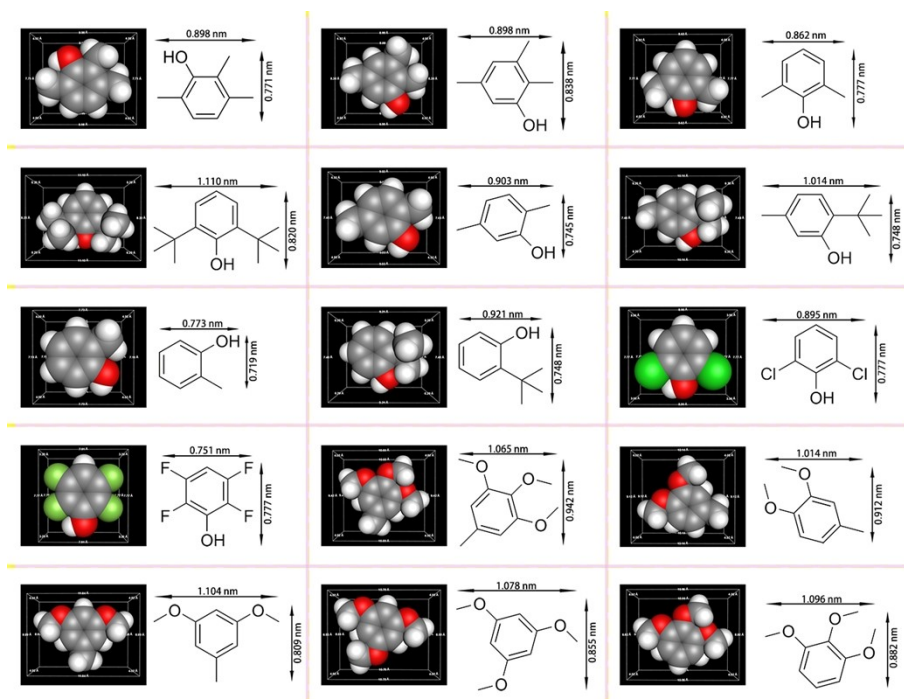

Fig. S16. The molecular sizes of different organic substrates. These molecular sizes are calculated based on the Corey-Pauling-Koltun (CPK) model.<sup>S2</sup>

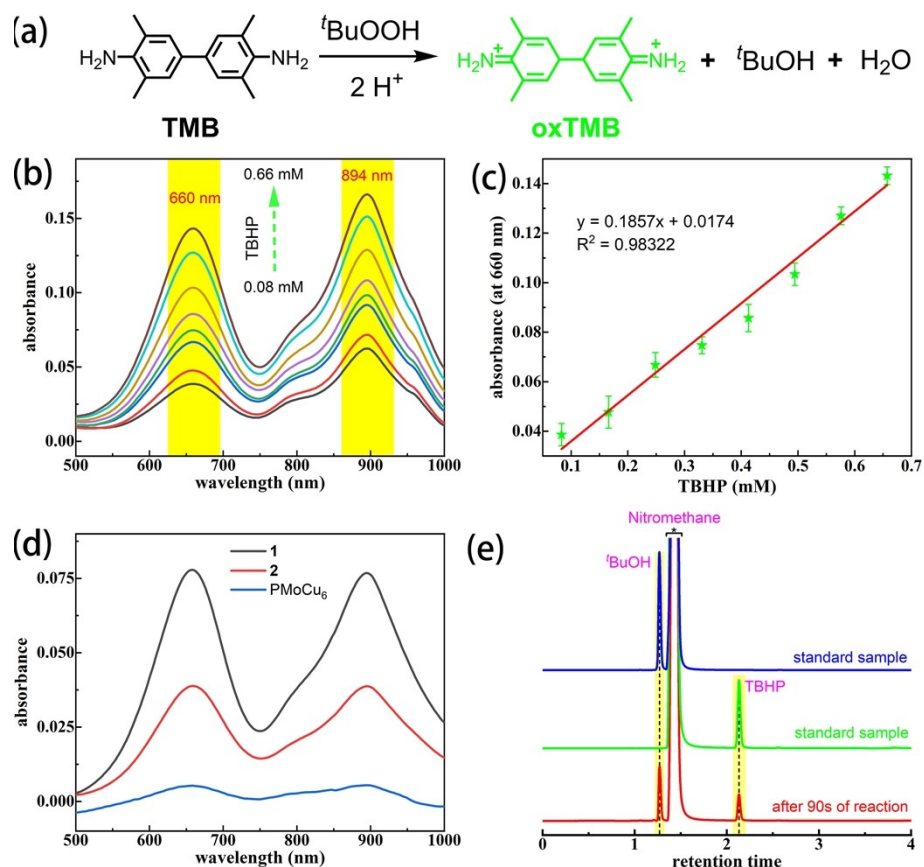

**Fig. S17.** The detection of oxidant. (a) The oxidation reaction of TMB in the presence of TBHP. (b) UV-vis spectra of TMB oxidation with various TBHP concentrations in buffer solution (pH~3.95). (c) The dose-response curve and the linear calibration plot for TBHP detection. (d) UV-vis spectra of TMB oxidation with the filtrate of TMP oxidation reaction catalyzed by compounds **1-2** and PMoCu<sub>6</sub> (the reaction conditions of TMP oxidation: 0.25 mmol of TMP, 0.15mol% of catalysts, 2.25 equivalent of TBHP, 0.5 mL MeCN at 60 °C for 8 min for **1**, 10 min for **2**, and 30 min for PMoCu<sub>6</sub>). (e) The GC-FID signals recording the TMB transformation process in the presence of TBHP (3.12 μmol of TMB, 2.03 μmol of TBHP, excessive 0.1M HCl, and 3 mL of nitromethane at 40 °C for 2 min).

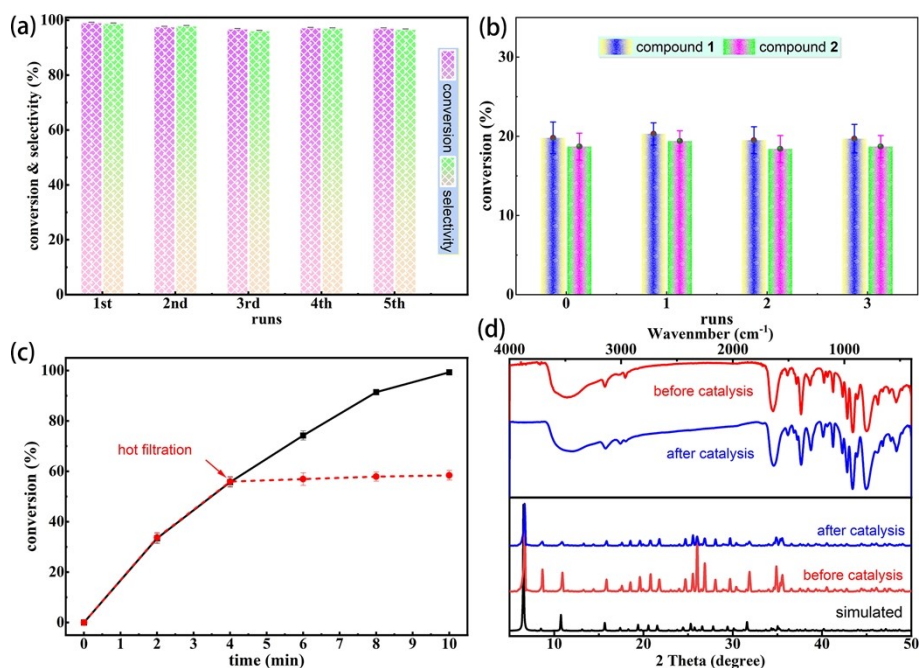

**Fig. S18.** The test of the heterogeneous nature and the stability of the catalyst **1** and **2**. (a) The recycle test for the oxidation of TMP to TMBQ using recovered **2**. (b) The recycle test of **1** and **2** in the kinetic regime (0.25 mmol of TMP, 0.15mol% of catalysts, 2.25 equivalent of TBHP, 0.5 mL MeCN at 60 °C for 1 min). (c) Hot filtration test for TMP oxidation over **2** under optimal reaction conditions. (d) IR spectra and PXRD patterns for **2** before and after catalysis.

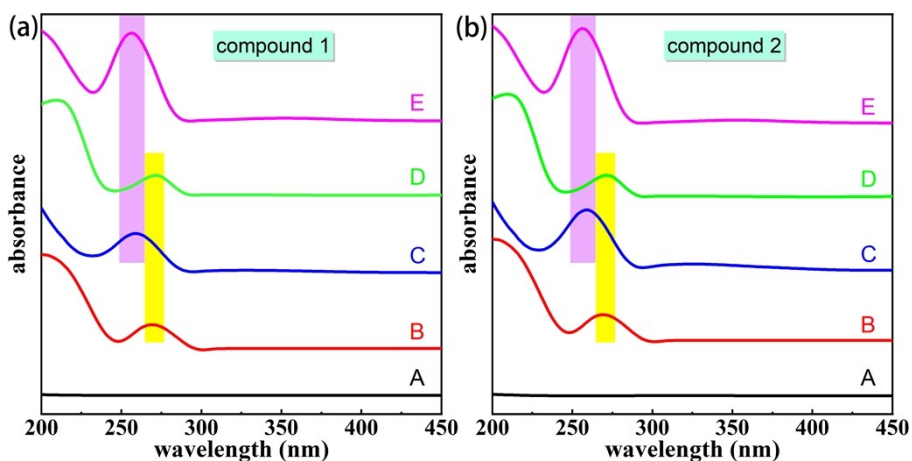

**Fig. S19.** The UV-vis spectra of TMP oxidation catalyzed by **1** and **2**: (A) the UV-vis spectra of filtrate after reaction for 8-10 min under the optimal conditions without substrate; (B) the UV-vis spectra of filtrate before reaction; (C) the UV-vis spectra of filtrate after reaction; (D) the UV-vis spectra of pure TMP; (E) the UV-vis spectra of pure TMBQ.



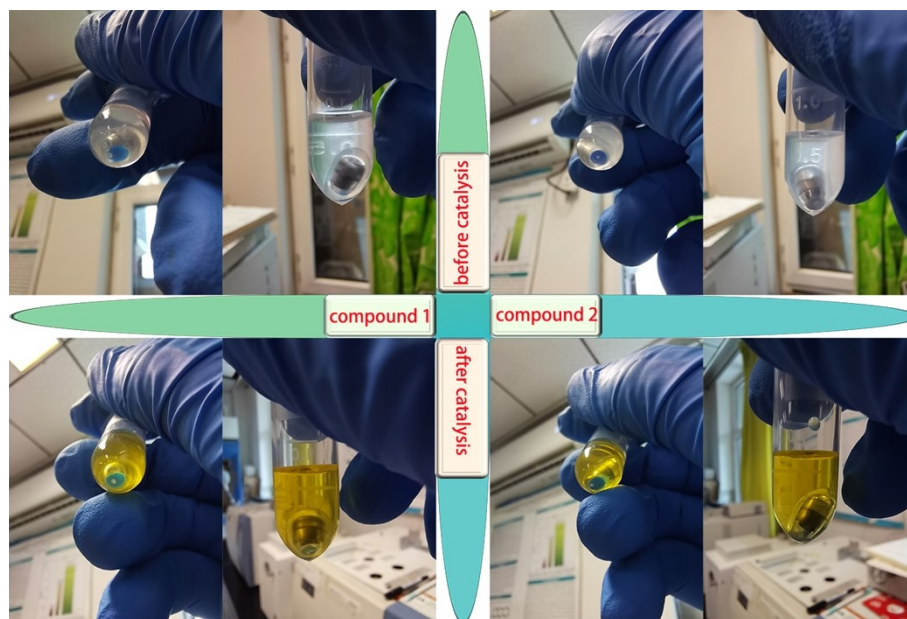

**Fig. S20.** The photographs of compound 1 and 2 before and after catalysis.

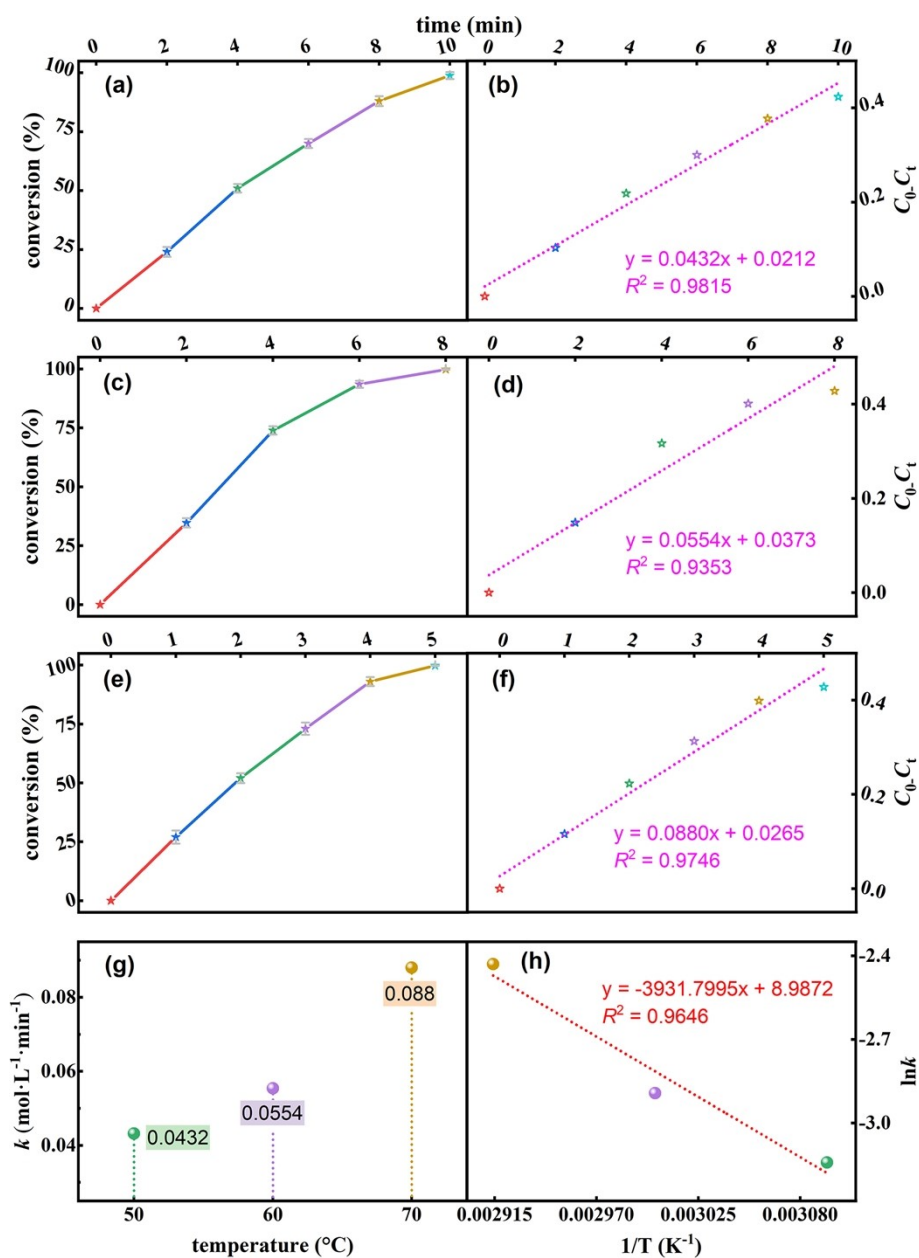

**Fig. S21.** Kinetic profiles of oxidation of TMP catalyzed by **1** with TBHP in CH<sub>3</sub>CN. (a) Time profile curves and (b) first order kinetics fitting curves at 50 °C. (c) Time profile curves and (d) first order kinetics fitting curves at 60 °C. (e) Time profile curves and (f) first order kinetics fitting curves at 70 °C. (g) The corresponding  $k$  at different temperatures. (h) The Arrhenius-Eyring plot ( $\ln k = -(E_a/RT) + \ln A$ ).  $C_0$  and  $C_t$  represent the TMP concentration at the initial time and  $t$  min.

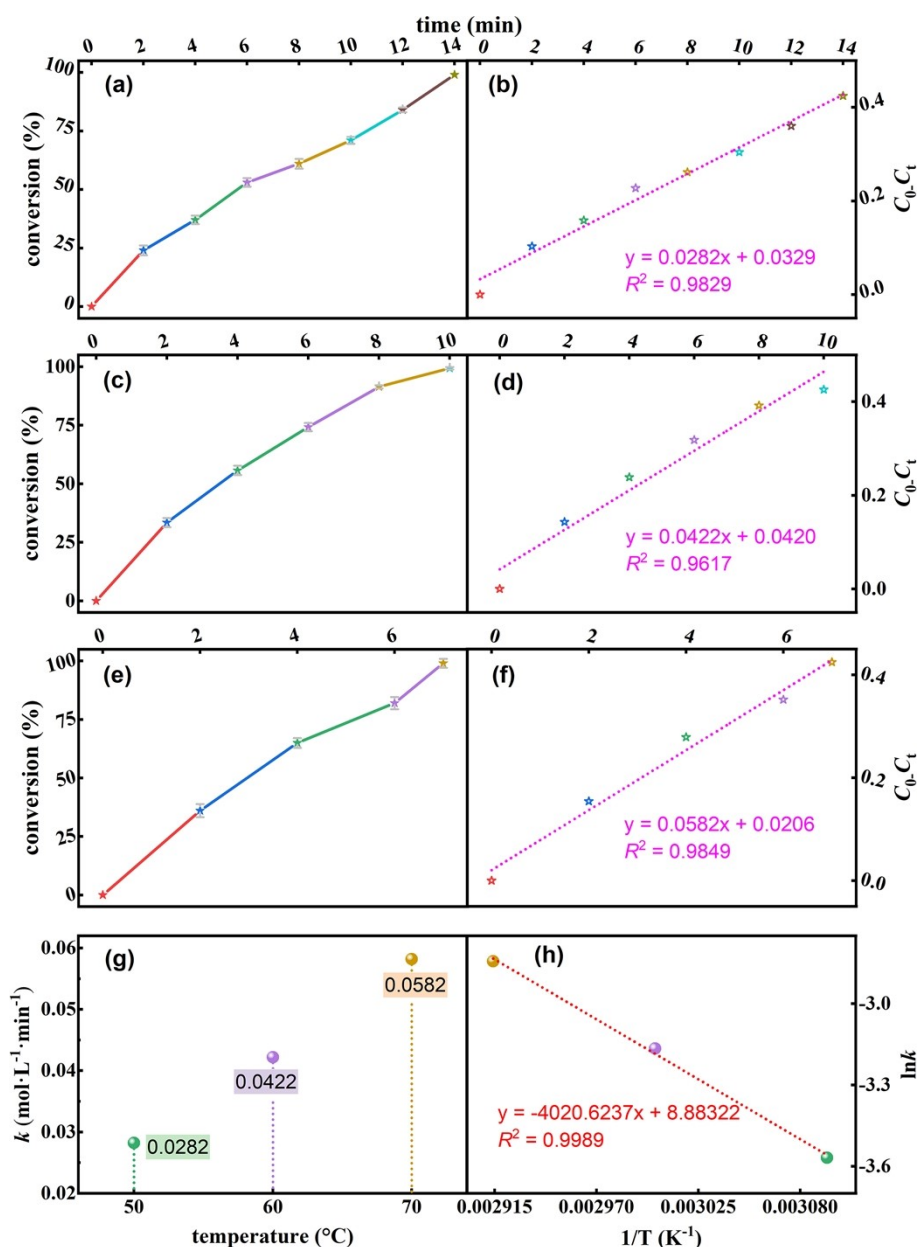

**Fig. S22.** Kinetic profiles of oxidation of TMP catalyzed by **2** with TBHP in CH<sub>3</sub>CN. (a) Time profile curves and (b) first order kinetics fitting curves at 50 °C. (c) Time profile curves and (d) first order kinetics fitting curves at 60 °C. (e) Time profile curves and (f) first order kinetics fitting curves at 70 °C. (g) The corresponding  $k$  at different temperatures. (h) The Arrhenius-Eyring plot ( $\ln k = -(E_a/RT) + \ln A$ ).  $C_0$  and  $C_t$  represent the TMP concentration at the initial time and  $t$  min.

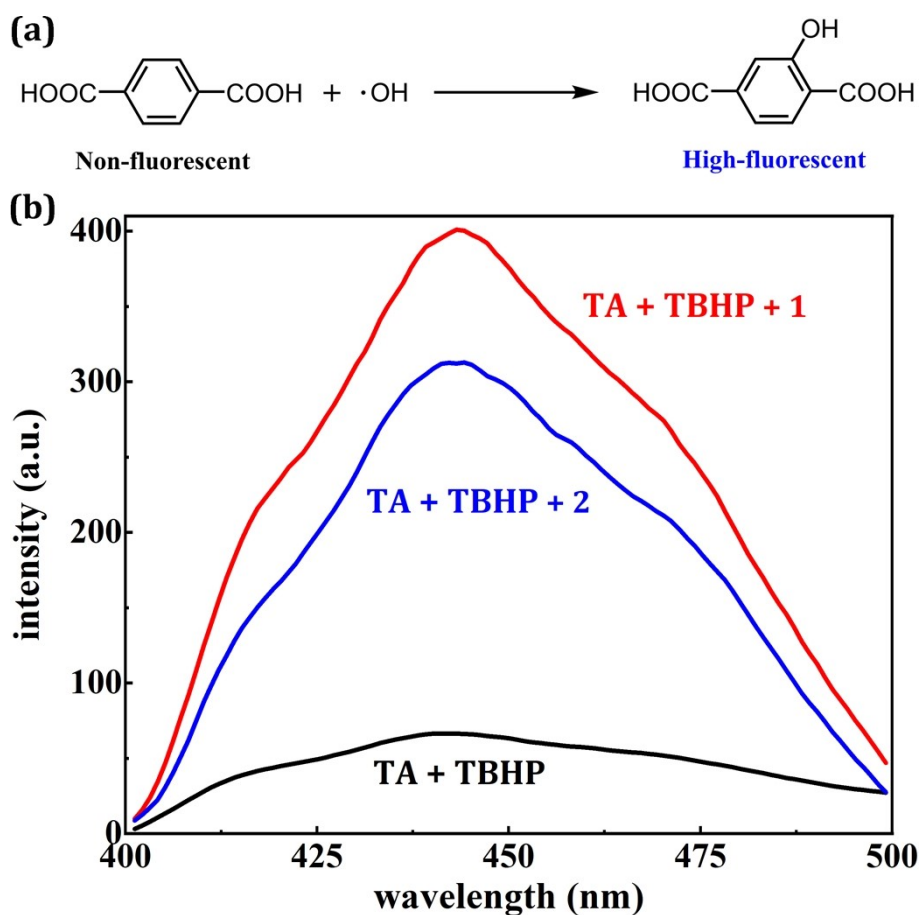

**Fig. S23.** The photoluminescence detection technology for probing hydroxyl radicals. (a) Hydroxyl radicals induced the conversion of non-fluorescent terephthalic acid (TA) to highly-fluorescent 2-hydroxyterephthalic acid. (b) Fluorescence spectra of TA solution ( $3 \times 10^{-3}$  mol/L) in the absence and presence of catalysts with TBHP (300 mM). 0 mg catalyst, and 5 mg compounds 1-2 during photoluminescence probing, respectively.

**Section IV. Supplementary Tables**

**Table S1.** The oxidation of TMP to TMBQ catalyzed by **1**<sup>a</sup>.

| entry           | catal.<br>( $\mu$ mol) | TBHP<br>(mmol) | temp.<br>( $^{\circ}$ C) | solvent<br>(0.5 mL) | time<br>(min) | con.<br>(%) <sup>b</sup> | yield<br>(%) <sup>c</sup> | TOF<br>(h <sup>-1</sup> ) <sup>d</sup> | TOF<br>(h <sup>-1</sup> ) <sup>e</sup> |
|-----------------|------------------------|----------------|--------------------------|---------------------|---------------|--------------------------|---------------------------|----------------------------------------|----------------------------------------|
| 1               | 0                      | 0.55           | 60                       | MeCN                | 60            | 16.8                     | 11.6                      | —                                      | —                                      |
| 2               | 0.625                  | 0              | 60                       | MeCN                | 60            | trace                    | trace                     | —                                      | —                                      |
| 3               | 0                      | 0              | 60                       | MeCN                | 60            | trace                    | trace                     | —                                      | —                                      |
| 4               | 0.625                  | 0.625          | r.t.                     | MeCN                | 100           | >99                      | 86.7                      | 240                                    | 208                                    |
| 5               | 0.625                  | 0.625          | 40                       | MeCN                | 60            | >99                      | 91.9                      | 400                                    | 368                                    |
| 6               | 0.625                  | 0.625          | 50                       | MeCN                | 10            | >99                      | 96.0                      | 2400                                   | 2304                                   |
| 7               | 0.625                  | 0.625          | 60                       | MeCN                | 8             | >99                      | 98.6                      | 3000                                   | 2958                                   |
| 8               | 0.625                  | 0.625          | 70                       | MeCN                | 5             | >99                      | 97.9                      | 4800                                   | 4699                                   |
| 9               | 0.625                  | 0.625          | 80                       | MeCN                | 4             | >99                      | 97.1                      | 6000                                   | 5826                                   |
| 10              | 0.5                    | 0.625          | 60                       | MeCN                | 8             | >99                      | 98.9                      | 3750                                   | 3709                                   |
| 11              | 0.375                  | 0.625          | 60                       | MeCN                | 8             | >99                      | >99                       | 5000                                   | 5000                                   |
| 12              | 0.25                   | 0.625          | 60                       | MeCN                | 10            | >99                      | 94                        | 6000                                   | 5640                                   |
| 13              | 0.375                  | 0.50           | 60                       | MeCN                | 8             | 97.9                     | 94.8                      | 4895                                   | 4740                                   |
| 14              | 0.375                  | 0.55           | 60                       | MeCN                | 8             | >99                      | >99                       | 5000                                   | 5000                                   |
| 15              | 0.375                  | 0.70           | 60                       | MeCN                | 7             | >99                      | >99                       | 5714                                   | 5714                                   |
| 16 <sup>f</sup> | 0.375                  | 0.55           | 60                       | MeCN                | 6             | 89.4                     | 84.1                      | 4470                                   | 4205                                   |
| 17 <sup>g</sup> | 0.375                  | 1 atm          | 60                       | MeCN                | 180           | trace                    | trace                     | —                                      | —                                      |
| 18 <sup>h</sup> | 18.75                  | 27.5           | 60                       | MeCN                | 12            | >99                      | 94.5                      | 3333                                   | 3150                                   |

<sup>a</sup>Reaction conditions: 0.25 mmol of TMP. <sup>b</sup>Results determined by GC using naphthalene as internal standard. <sup>c</sup>Yield to TMBQ. <sup>d</sup>Turnover frequency (TOF) = (mol of TMP consumed)/(mol of the catalyst used  $\times$  reaction time). <sup>e</sup>TOF = (mol of TMBQ yielded)/(mol of the catalyst used  $\times$  reaction time). <sup>f</sup>30% H<sub>2</sub>O<sub>2</sub> as oxidant. <sup>g</sup>O<sub>2</sub> as oxidant. <sup>h</sup>enlarged-scale test: 12.5 mmol of TMP, 20 mL of solvent.

**Table S2.** The oxidation of TMP to TMBQ catalyzed by **1** under different solvent<sup>a</sup>.

| entry          | solvent (0.5 mL) | con. (%) <sup>b</sup> | yield (%) <sup>c</sup> | TOF (h <sup>-1</sup> ) <sup>d</sup> | TOF (h <sup>-1</sup> ) <sup>e</sup> |
|----------------|------------------|-----------------------|------------------------|-------------------------------------|-------------------------------------|
| 1              | MeOH             | 58.9                  | 57.1                   | 2945                                | 4315                                |
| 2              | EtOH             | 57.0                  | 48.5                   | 2850                                | 4250                                |
| 3              | i-PrOH           | 54.8                  | 53.8                   | 2740                                | 4655                                |
| 4              | <i>n</i> -BuOH   | 57.6                  | 56.7                   | 2880                                | 4665                                |
| 5              | Acetone          | 96.0                  | 92.0                   | 4800                                | 4600                                |
| 6 <sup>f</sup> | DMF              | 97.9                  | 73.8                   | 4895                                | 3690                                |
| 7 <sup>f</sup> | DMSO             | 97.9                  | 83.6                   | 4895                                | 4180                                |
| 8              | THF              | 75.1                  | 75.1                   | 3755                                | 3755                                |
| 9              | Pyridine         | 98.8                  | 96.8                   | 4940                                | 4840                                |
| 10             | DCM              | 54.7                  | 44.8                   | 2735                                | 2240                                |
| 11             | Chloroform       | 6.17                  | 4.07                   | 308.5                               | 203.5                               |
| 12             | Nitromethane     | 95.7                  | 95.7                   | 4785                                | 4785                                |
| 13             | <i>n</i> -Hexane | 26.5                  | 19.1                   | 1325                                | 955                                 |
| 14             | Cyclohexane      | 12.2                  | 10.5                   | 610                                 | 525                                 |
| 15             | <i>n</i> -Octane | 13.7                  | 11.8                   | 685                                 | 590                                 |
| 16             | Benzene          | 12.5                  | 10.1                   | 625                                 | 505                                 |
| 17             | Toluene          | 3.26                  | trace                  | 163                                 | —                                   |
| 18             | Ethylbenzene     | 10.5                  | 6.42                   | 525                                 | 321                                 |
| 19             | Mesitylene       | 5.84                  | trace                  | 292                                 | —                                   |
| 20             | TFT              | 2.50                  | trace                  | 125                                 | —                                   |

<sup>a</sup>Reaction conditions: 0.25 mmol of TMP, 0.15mol% of catalysts, 2.2 equivalents of TBHP, 60 °C and reaction time: 8 min. <sup>b</sup>Results determined by GC using naphthalene as internal standard. <sup>c</sup>Yield to TMBQ. <sup>d</sup>TOF = (mol of TMP consumed)/(mol of the catalyst used × reaction time). <sup>e</sup>TOF = (mol of TMBQ yielded)/(mol of the catalyst used × reaction time). <sup>f</sup>Homogeneous system.

**Table S3.** Comparison of representative systems for TMP oxidation.

| entry | catal.                                     | oxidant                       | temp. (°C) | time (min) | con. (%) | sel. (%) | TOF (h <sup>-1</sup> ) | reaction system | ref.      |
|-------|--------------------------------------------|-------------------------------|------------|------------|----------|----------|------------------------|-----------------|-----------|
| 1     | <b>1</b>                                   | TBHP                          | 60         | 8          | >99      | >99      | 5000                   | heterogeneous   | this work |
| 2     | <b>2</b>                                   | TBHP                          | 60         | 10         | >99      | 98.7     | 4000                   | heterogeneous   |           |
| 3     | <b>PMoCu<sub>6</sub></b>                   | H <sub>2</sub> O <sub>2</sub> | 80         | 5          | >99      | >99      | 2400                   | heterogeneous   | S3        |
| 4     | <b>PWCu<sub>6</sub></b>                    | H <sub>2</sub> O <sub>2</sub> | 80         | 6          | >99      | >99      | 2000                   | heterogeneous   | S3        |
| 5     | <b>PMoCu<sub>3</sub></b>                   | H <sub>2</sub> O <sub>2</sub> | 80         | 8          | >99      | >99      | 1500                   | heterogeneous   | S3        |
| 6     | <b>PWCu<sub>3</sub></b>                    | H <sub>2</sub> O <sub>2</sub> | 80         | 15         | >99      | >99      | 800                    | heterogeneous   | S3        |
| 7     | <b>PWCu<sub>4</sub></b>                    | H <sub>2</sub> O <sub>2</sub> | 60         | 20         | >99      | >99      | 300                    | heterogeneous   | S4        |
| 8     | <b>PWCu<sub>4</sub></b>                    | H <sub>2</sub> O <sub>2</sub> | 80         | 15         | >99      | >99      | 396                    | heterogeneous   | S4        |
| 9     | <b>PWCu<sub>17</sub></b>                   | H <sub>2</sub> O <sub>2</sub> | 60         | 10         | >99      | 96       | 576                    | heterogeneous   | S4        |
| 10    | <b>PWCu<sub>17</sub></b>                   | H <sub>2</sub> O <sub>2</sub> | 80         | 8          | >99      | 95       | 742                    | heterogeneous   | S4        |
| 11    | <b>γ-PW<sub>10</sub>V<sub>2</sub></b>      | H <sub>2</sub> O <sub>2</sub> | 80         | 4          | >99      | >99      | 500                    | homogeneous     | S5        |
| 12    | <b>γ-PW<sub>10</sub>V<sub>2</sub></b>      | H <sub>2</sub> O <sub>2</sub> | 80         | 2          | >99      | 78       | 1000                   | homogeneous     | S5        |
| 13    | <b>PW<sub>11</sub>Ti</b>                   | H <sub>2</sub> O <sub>2</sub> | 80         | 30         | 90       | 45       | 60                     | homogeneous     | S6        |
| 14    | <b>PW<sub>11</sub>Zr</b>                   | H <sub>2</sub> O <sub>2</sub> | 80         | 60         | 90       | 30       | 18                     | homogeneous     | S7        |
| 15    | <b>γ-PW<sub>10</sub>V<sub>2</sub>/CNTs</b> | H <sub>2</sub> O <sub>2</sub> | 60         | 15         | >99      | >99      | 500                    | heterogeneous   | S8        |
| 16    | <b>FePcS/MIL-101</b>                       | TBHP                          | 30         | 15         | 95       | 57       | 380                    | heterogeneous   | S9        |
| 17    | <b>Ti/MIL-125</b>                          | H <sub>2</sub> O <sub>2</sub> | 80         | 15         | 70       | 100      | 90                     | heterogeneous   | S10       |
| 18    | <b>Ti/SiO<sub>2</sub></b>                  | H <sub>2</sub> O <sub>2</sub> | 80         | 30         | 100      | 98       | 126                    | heterogeneous   | S11       |
| 19    | <b>Ti<sub>2</sub>/SiO<sub>2</sub></b>      | H <sub>2</sub> O <sub>2</sub> | 80         | 30         | 99       | 96       | 114                    | heterogeneous   | S12       |
| 20    | <b>Ti<sub>4</sub>/SiO<sub>2</sub></b>      | H <sub>2</sub> O <sub>2</sub> | 80         | 30         | 100      | 97       | 120                    | heterogeneous   | S12       |
| 21    | <b>Ti/Si-EISA</b>                          | H <sub>2</sub> O <sub>2</sub> | 80         | 40         | 100      | 100      | 138                    | heterogeneous   | S13       |
| 22    | <b>Ti/SBA-15</b>                           | H <sub>2</sub> O <sub>2</sub> | 80         | 60         | 100      | 100      | 204                    | heterogeneous   | S14       |
| 23    | <b>TS-1</b>                                | H <sub>2</sub> O <sub>2</sub> | 80         | 180        | >99      | 96       | 10                     | heterogeneous   | S15       |
| 24    | <b>Cu/SBA-15</b>                           | H <sub>2</sub> O <sub>2</sub> | 80         | 40         | 100      | 98       | 9660                   | heterogeneous   | S16       |
| 25    | <b>NBND</b>                                | H <sub>2</sub> O <sub>2</sub> | 60         | 360        | >99      | 97       | —                      | heterogeneous   | S17       |
| 26    | <b>OLC-1</b>                               | TBHP                          | 80         | 720        | >99      | 82.5     | —                      | heterogeneous   | S18       |
| 27    | <b>CuCl<sub>2</sub></b>                    | H <sub>2</sub> O <sub>2</sub> | 60         | 8          | >99      | 90       | 250                    | homogeneous     | S4        |

**Table S4.** Comparison of TMP oxidation catalyzed by compounds **1-2** and P<sub>4</sub>MoCu<sub>6</sub> with TBHP as oxidant<sup>a</sup>.

| catal                                         | time (min) | con. (%) <sup>b</sup> | sel. (%) | TOF (h <sup>-1</sup> ) <sup>c</sup> | oxidant efficiency (%) <sup>d</sup> |
|-----------------------------------------------|------------|-----------------------|----------|-------------------------------------|-------------------------------------|
| <b>1</b>                                      | 8          | >99                   | >99      | 5000                                | 94.25                               |
| <b>2</b>                                      | 10         | >99                   | 98.7     | 4000                                | 90.87                               |
| P <sub>4</sub> MoCu <sub>6</sub> <sup>e</sup> | 30         | 98.4                  | 97.4     | 1312                                | 87.35                               |
| <b>1</b> <sup>f</sup>                         | 5          | 94.4                  | 92.8     | 2266                                | 76.45                               |
| <b>2</b> <sup>f</sup>                         | 5          | 94.5                  | 91.5     | 2268                                | 73.87                               |
| P <sub>4</sub> MoCu <sub>6</sub> <sup>f</sup> | 5          | >99                   | 99       | 2400                                | 82.77                               |

<sup>a</sup>Reaction conditions: 0.25 mmol of TMP, 0.15mol% of catalysts, 2.2 equivalents of TBHP, 0.5 mL MeCN, and 60 °C. <sup>b</sup>Results determined by GC using naphthalene as internal standard. <sup>c</sup>Turnover frequency (TOF) = (mol of TMP consumed)/(mol of the catalyst used × reaction time). <sup>d</sup>TBHP efficiency (%) = 100 × (mol of TBHP consumed in the formation of TMBQ/mol of TBHP converted). The calculation results are as follows. <sup>e</sup>The catalyst used is from reference S3, but the reaction conditions are the same as **1** and **2**. <sup>f</sup>Reaction conditions (0.25 mmol of TMP, 0.50mol% of catalysts, 4.0 equivalents of H<sub>2</sub>O<sub>2</sub>, 0.5 mL MeCN, and 80 °C.) or results are quoted from reference S3.

*Calculation of the efficiency of the oxidant for 1:*

- The mol of TBHP consumed in the formation of TMBQ (yield: >99 %) from 0.25 mmol TMP = 0.5 mmol
- Total mol of TBHP has been originally used for the reaction = 0.55 mmol;
- The remaining mol of TBHP in the system after the reaction = 0.0195 mmol
- TBHP efficiency (%) = 100 × [0.5/(0.55-0.0195)] = 94.25%

*Calculation of the efficiency of the oxidant for 2:*

- The mol of TBHP consumed in the formation of TMBQ (yield: 98.7 %) from 0.25 mmol TMP = 0.4935 mmol
- Total mol of TBHP has been originally used for the reaction = 0.55 mmol;
- The remaining mol of TBHP in the system after the reaction = 0.0069 mmol
- TBHP efficiency (%) = 100 × [0.4935/(0.55-0.0069)] = 90.87%

*Calculation of the efficiency of the oxidant for P<sub>4</sub>MoCu<sub>6</sub>:*

- The mol of TBHP consumed in the formation of TMBQ (yield: 95.84 %) from 0.25 mmol TMP = 0.4792 mmol



- Total mol of TBHP has been originally used for the reaction = 0.55 mmol;
- The remaining mol of TBHP in the system after the reaction = 0.0014 mmol
- TBHP efficiency (%) =  $100 \times [0.4792/(0.55-0.0014)] = 87.35\%$

**Table S5.** Investigated the change of the content of W atom and Cu atom in the catalyst system after the oxidation reaction of TMP with ICP-AES.

| The change of catalyst quality before and after reaction <sup>a</sup> |          |          |          |          |
|-----------------------------------------------------------------------|----------|----------|----------|----------|
|                                                                       | before   |          | after    |          |
|                                                                       | <b>1</b> | <b>2</b> | <b>1</b> | <b>2</b> |
| total mass/mg                                                         | 1.6      | 1.7      | 1.5      | 1.5      |

  

| The metal content in filtrate after reaction <sup>b</sup> |                       |                       |                       |                       |
|-----------------------------------------------------------|-----------------------|-----------------------|-----------------------|-----------------------|
|                                                           | W                     |                       | Cu                    |                       |
|                                                           | <b>1</b>              | <b>2</b>              | <b>1</b>              | <b>2</b>              |
| c/mg·mL <sup>-1</sup>                                     | $4.04 \times 10^{-4}$ | $6.11 \times 10^{-4}$ | $1.01 \times 10^{-4}$ | $2.53 \times 10^{-4}$ |

<sup>a</sup>Reaction conditions: 0.25 mmol of TMP, 0.15mol% of catalysts, 2.2 equivalents of TBHP, 0.5 mL MeCN, 60 °C and reaction time: 8 min for **1** and 10 min for **2**. The loss of total mass before and after catalysis may be caused by some inevitable physical factors in the recovery process. <sup>b</sup>After the reaction filtrate was rotary evaporated, 3 mL of ultrapure water was added and stirred at 60 °C for 10 minutes, and then filtered with a syringe filter to obtain the filtrate.

**Table S6.** Crystal data and structure refinement for **1** and **2**.

| Compound                                                                    | <b>1</b>                                                                                                        | <b>2</b>                                                                                                         |
|-----------------------------------------------------------------------------|-----------------------------------------------------------------------------------------------------------------|------------------------------------------------------------------------------------------------------------------|
| CCDC number                                                                 | 2052783                                                                                                         | 2069056                                                                                                          |
| Formula                                                                     | C <sub>18</sub> H <sub>48</sub> N <sub>24</sub> K <sub>3</sub> Cu <sub>3</sub> BW <sub>12</sub> O <sub>66</sub> | C <sub>18</sub> H <sub>67</sub> N <sub>24</sub> K <sub>3</sub> Cu <sub>3</sub> SiW <sub>12</sub> O <sub>76</sub> |
| Formula weight                                                              | 4181.73                                                                                                         | 4378.16                                                                                                          |
| <i>T</i> (K)                                                                | 190(2)                                                                                                          | 296(2)                                                                                                           |
| Crystal system                                                              | Trigonal                                                                                                        | Trigonal                                                                                                         |
| Space group                                                                 | <i>R</i> -3                                                                                                     | <i>P</i> -3                                                                                                      |
| <i>a</i> (Å)                                                                | 35.1668(9)                                                                                                      | 15.570(3)                                                                                                        |
| <i>b</i> (Å)                                                                | 35.1668(9)                                                                                                      | 15.570(3)                                                                                                        |
| <i>c</i> (Å)                                                                | 20.2270(6)                                                                                                      | 10.337(3)                                                                                                        |
| $\alpha$ (°)                                                                | 90                                                                                                              | 90                                                                                                               |
| $\beta$ (°)                                                                 | 90                                                                                                              | 90                                                                                                               |
| $\gamma$ (°)                                                                | 120                                                                                                             | 120                                                                                                              |
| <i>V</i> (Å <sup>3</sup> )                                                  | 21663.5(12)                                                                                                     | 2170.3(11)                                                                                                       |
| <i>Z</i>                                                                    | 9                                                                                                               | 1                                                                                                                |
| $\mu$ (mm <sup>-1</sup> )                                                   | 15.153                                                                                                          | 16.836                                                                                                           |
| Index ranges                                                                | -41 ≤ <i>h</i> ≤ 36                                                                                             | -15 ≤ <i>h</i> ≤ 18                                                                                              |
|                                                                             | -41 ≤ <i>k</i> ≤ 41                                                                                             | -18 ≤ <i>k</i> ≤ 18                                                                                              |
|                                                                             | -24 ≤ <i>l</i> ≤ 23                                                                                             | -12 ≤ <i>l</i> ≤ 12                                                                                              |
| Reflections collected                                                       | 39054                                                                                                           | 11390                                                                                                            |
| Independent reflections                                                     | 8468                                                                                                            | 2548                                                                                                             |
| <i>R</i> <sub>int</sub>                                                     | 0.0503                                                                                                          | 0.0457                                                                                                           |
| Data/restraints/parameters                                                  | 8468/111/646                                                                                                    | 2554/36/233                                                                                                      |
| GOF on <i>F</i> <sup>2</sup>                                                | 1.350                                                                                                           | 1.075                                                                                                            |
| <i>R</i> <sub>1</sub> , <i>wR</i> <sub>2</sub> [ <i>I</i> > 2σ( <i>I</i> )] | 0.0775, 0.1653                                                                                                  | 0.0445, 0.1258                                                                                                   |
| <i>R</i> <sub>1</sub> , <i>wR</i> <sub>2</sub> (all data)                   | 0.0808, 0.1667                                                                                                  | 0.0475, 0.1284                                                                                                   |

$$R_I = \Sigma||F_o| - |F_c||/\Sigma|F_o|. \quad wR_2 = \Sigma[w(F_o^2 - F_c^2)^2]/\Sigma[w(F_o^2)^2]^{1/2}$$

## Section V. References

- S1. C. Rocchiccioli-Deltcheff, M. Fournier, R. Franck and R. Thouvenot, *Inorg. Chem.*, 1983, **22**, 207–216.
- S2. Z. Zhang, Y. W. Liu, H. R. Tian, X. H. Li, S. M. Liu, Y. Lu, Z. X. Sun, T. Liu and S. X. Liu, *Matter*, 2020, **2**, 250-260.
- S3. S. Z. Chang, Y. H. Chen, H. Y. An, Q. S. Zhu, H. Y. Luo and T. Q. Xu, *ACS Appl. Mater. Interfaces*, 2021, **13**, 21261–21271.
- S4. S. Z. Chang, H. Y. An, Y. H. Chen, Y. J. Hou, J. Zhang and Q. S. Zhu, *ACS Appl. Mater. Interfaces*, 2019, **11**, 37908–37919.
- S5. I. D. Ivanchikova, N. V. Maksimchuk, R. I. Maksimovskaya, G. M. Maksimov and O. A. Kholdeeva, *ACS Catal.*, 2014, **4**, 2706–2713.
- S6. O. A. Kholdeeva, T. A. Trubitsina, G. M. Maksimov, A. V. Golovin and R. I. Maksimovskaya, *Inorg. Chem.*, 2005, **44**, 1635–1642.
- S7. O. A. Kholdeeva, G. M. Maksimov, R. I. Maksimovskaya, M. P. Vanina, T. A. Trubitsina, D. Y. Naumov, B. A. Kolesov, N. S. Antonova, J. J. Carbo and J. M. Poblet, *Inorg. Chem.*, 2006, **45**, 7224–7234.
- S8. V. Y. Evtushok, A. Suboch, O. Y. Podyacheva, O. A. Stonkus, V. I. Zaikovskii, Y. A. Chesalov, L. S. Kibis and O. A. Kholdeeva, *ACS Catal.*, 2018, **8**, 1297–1307.
- S9. O. V. Zalomaeva, K. A. Kovalenko, Y. A. Chesalov, M. S. Mel'gunov, V. I. Zaikovskii, V. V. Kaichev, A. B. Sorokin, O. A. Kholdeeva and V. P. Fedin, *Dalton Trans.*, 2011, **40**, 1441–1444.
- S10. I. D. Ivanchikova, J. S. Lee, N. V. Maksimchuk, A. N. Shmakov, Y. A. Chesalov, A. B. Ayupov, Y. K. Hwang, C. H. Jun, J. S. Chang and O. A. Kholdeeva, *Eur. J. Inorg. Chem.*, 2014, **2014**, 132–139.
- S11. O. A. Kholdeeva, I. D. Ivanchikova, M. Guidotti and N. Ravasio, *Green Chem.*, 2007, **9**, 731–733.
- S12. O. A. Kholdeeva, I. D. Ivanchikova, M. Guidotti, C. Pirovano, N. Ravasio, M. V. Barmatova and Y. A. Chesalov, *Adv. Synth. Catal.*, 2009, **351**, 1877–1889.
- S13. I. D. Ivanchikova, M. K. Kovalev, M. S. Mel'gunov, A. N. Shmakov and O. A. Kholdeeva, *Catal. Sci. Technol.*, 2014, **4**, 200–207.
- S14. M. Selvaraj, *Catal. Sci. Technol.*, 2014, **4**, 2674–2684.
- S15. J. Zhou, Z. L. Hua, X. Z. Cui, Z. Q. Ye, F. M. Cui and J. L. Shi, *Chem. Commun.*, 2010, **46**, 4994–4996.
- S16. M. Selvaraj and M. A. Assiri, *Dalton Trans.*, 2019, **48**, 3291–3299.
- S17. Y. M. Lin, Z. G. Liu, Y. M. Niu, B. S. Zhang, Q. Lu, S. H. Wu, G. Centi, S. Perathoner, S. Heumann, L. H. Yu and D. S. Su, *ACS Nano*, 2019, **13**, 13995–14004.
- S18. Y. M. Lin, B. Li, Z. B. Feng, Y. A. Kim, M. Endo and D. S. Su, *ACS Catal.*, 2015, **5**, 5921–5926.
